# Supplementary material for: Nucleoside-Lipid-Based Nanoparticles for Phenazine Delivery: A New Therapeutic Strategy to Disrupt Hsp27-eIF4E Interaction in Castration Resistant Prostate Cancer
Source: MDPI journal article supplement (doi:10.3390/pharmaceutics13050623), 2021-04-27
Supplement: s1 [file s1]

# Supplementary Materials: Nucleoside-Lipid-Based Nanoparticles for Phenazine Delivery: A New Therapeutic Strategy to Disrupt Hsp27-eIF4E Interaction in Castration Resistant Prostate Cancer

Hajer Ziouziou, Clément Paris, Sébastien Benizri, Thi Khanh Le, Claudia Andrieu, Dang Tan Nguyen, Ananda Appavoo, David Taïeb, Frédéric Brune, Ridha Oueslati, Olivier Siri, Michel Camplo, Philippe Barthélémy and Palma Rocchi

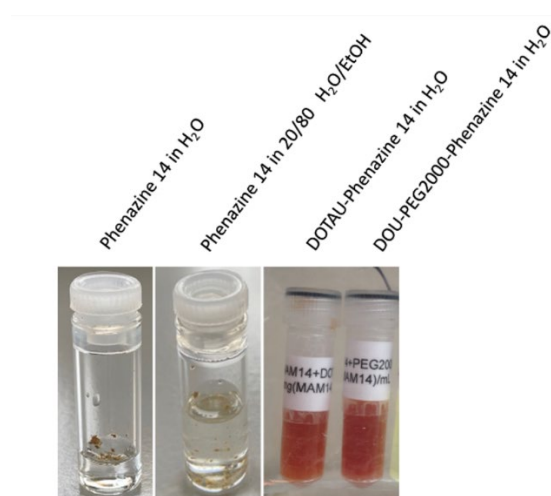

**Figure S1.** Phenazine # 14 Solubility. Phenazine 14 is not soluble in water and in 20/80 water/ethanol whereas DOTAU and DOU-PEG formulations are fully soluble in water.

**Table S1.** Mice volume tumor size evolution (in mm<sup>3</sup>) during 8 weeks of treatment for the non-treated group.

| Control |                           |        |        |        |        |        |        |       |       |
|---------|---------------------------|--------|--------|--------|--------|--------|--------|-------|-------|
| Week    | Mouse Tumor Volume in mm3 |        |        |        |        |        | Mean   | SD    | SEM   |
|         | 1                         | 2      | 3      | 4      | 5      | 6      |        |       |       |
| 1       | 65,5                      | 44,7   | 31,3   | 21,6   | 0,0    | 8,0    | 28,5   | 24,2  | 9,9   |
| 2       | 188,8                     | 125,4  | 717,3  | 268,1  | 317,9  | 132,0  | 291,6  | 221,9 | 90,6  |
| 3       | 625,1                     | 345,8  | 616,9  | 367,1  | 418,6  | 474,7  | 474,7  | 121,8 | 49,7  |
| 4       | 1194,2                    | 609,4  | 1098,8 | 844,8  | 1016,0 | 952,6  | 952,6  | 206,5 | 84,3  |
| 5       | 1212,5                    | 1571,5 | 1553,5 | 1108,2 | 1167,2 | 1322,6 | 1322,6 | 198,7 | 81,1  |
| 6       | 1090,9                    | 1746,1 | 1980,7 | 882,8  | 2853,4 | 1510,8 | 1677,4 | 704,7 | 287,7 |
| 7       | 1279,8                    | 3379,6 | 1425,6 | 2954,1 | 2259,8 | 2058,3 | 2226,2 | 827,8 | 337,9 |
| 8       | 1494,1                    | 2465,0 | 4071,0 | 2676,7 | 2338,3 | 2454,0 | 2583,2 | 836,6 | 341,5 |

**Table S2.** Mice volume tumor size evolution (in mm<sup>3</sup>) during 8 weeks of treatment for the phenazine # 14 group.

| Phenazine #14 |                           |      |
|---------------|---------------------------|------|
| Week          | Mouse Tumor Volume in mm3 | Mean |

|   | 1      | 2     | 3      | 4      | 5      | 6      | 7      | 8      |        |
|---|--------|-------|--------|--------|--------|--------|--------|--------|--------|
| 1 | 36,6   | 17,9  | 26,6   | 26,1   | 9,6    | 37,4   | 12,8   | 22,6   | 23,7   |
| 2 | 118,9  | 17,6  | 118,5  | 122,9  | 58,8   | 349,1  | 217,7  | 141,8  | 143,2  |
| 3 | 228,1  | 15,6  | 309,9  | 171,4  | 182,5  | 586,4  | 383,2  | 209,1  | 260,8  |
| 4 | 494,6  | 81,2  | 435,8  | 340,9  | 275,8  | 1079,7 | 522,9  | 385,3  | 452,0  |
| 5 | 470,0  | 123,3 | 503,5  | 705,9  | 1285,0 | 554,8  | 761,8  | 519,9  | 615,5  |
| 6 | 823,3  | 113,0 | 728,9  | 704,0  | 1296,8 | 887,2  | 880,8  | 934,2  | 796,0  |
| 7 | 1714,6 | 119,6 | 1009,6 | 1308,0 | 1192,7 | 918,8  | 920,8  | 1134,7 | 1039,8 |
| 8 | 1340,0 | 191,7 | 1618,0 | 880,8  | 1700,4 | 1377,4 | 1267,9 | 1375,5 | 1219,0 |

**Table S3.** Mice volume tumor size evolution (in mm<sup>3</sup>) during 8 weeks of treatment for the DOTAU-Cl alone group.

| Phenazine #14 |                           |       |        |        |        |        |        |        |        |
|---------------|---------------------------|-------|--------|--------|--------|--------|--------|--------|--------|
| Week          | Mouse Tumor Volume in mm3 |       |        |        |        |        |        |        | Mean   |
|               | 1                         | 2     | 3      | 4      | 5      | 6      | 7      | 8      |        |
| 1             | 36,6                      | 17,9  | 26,6   | 26,1   | 9,6    | 37,4   | 12,8   | 22,6   | 23,7   |
| 2             | 118,9                     | 17,6  | 118,5  | 122,9  | 58,8   | 349,1  | 217,7  | 141,8  | 143,2  |
| 3             | 228,1                     | 15,6  | 309,9  | 171,4  | 182,5  | 586,4  | 383,2  | 209,1  | 260,8  |
| 4             | 494,6                     | 81,2  | 435,8  | 340,9  | 275,8  | 1079,7 | 522,9  | 385,3  | 452,0  |
| 5             | 470,0                     | 123,3 | 503,5  | 705,9  | 1285,0 | 554,8  | 761,8  | 519,9  | 615,5  |
| 6             | 823,3                     | 113,0 | 728,9  | 704,0  | 1296,8 | 887,2  | 880,8  | 934,2  | 796,0  |
| 7             | 1714,6                    | 119,6 | 1009,6 | 1308,0 | 1192,7 | 918,8  | 920,8  | 1134,7 | 1039,8 |
| 8             | 1340,0                    | 191,7 | 1618,0 | 880,8  | 1700,4 | 1377,4 | 1267,9 | 1375,5 | 1219,0 |

  

| DOTAU |                           |        |        |        |        |        |        |        |        |
|-------|---------------------------|--------|--------|--------|--------|--------|--------|--------|--------|
| Week  | Mouse Tumor Volume in mm3 |        |        |        |        |        |        |        | Mean   |
|       | 1                         | 2      | 3      | 4      | 5      | 6      | 7      | 8      |        |
| 1     | 19,1                      | 38,9   | 24,7   | 0,0    | 0,0    | 46,9   | 31,5   | 32,7   | 24,2   |
| 2     | 282,1                     | 198,1  | 284,3  | 147,3  | 170,2  | 268,0  | 377,6  | 317,2  | 255,6  |
| 3     | 169,9                     | 225,3  | 482,7  | 764,6  | 212,1  | 145,7  | 464,1  | 308,4  | 346,6  |
| 4     | 227,8                     | 354,7  | 596,8  | 941,3  | 224,7  | 1139,0 | 400,9  | 555,0  | 555,0  |
| 5     | 1286,1                    | 552,8  | 472,5  | 1134,2 | 631,2  | 887,9  | 645,2  | 567,1  | 772,1  |
| 6     | 1007,8                    | 565,0  | 497,4  | 1178,8 | 935,1  | 2294,4 | 955,6  | 864,0  | 1037,2 |
| 7     | 1777,4                    | 956,4  | 1502,8 | 1381,0 | 1418,2 | 2304,1 | 1407,1 | 1345,3 | 1511,5 |
| 8     | 892,8                     | 1686,5 | 1147,3 | 1950,8 | 1567,4 | 2656,1 | 2143,1 | 1953,7 | 1749,7 |

**Table S4.** Mice volume tumor size evolution (in mm<sup>3</sup>) during 8 weeks of treatment for the NP<sup>DOTAU</sup>-phenazine #14 group.

| NP <sup>DOTAU</sup> -phenazine #14 |                           |        |       |        |       |       |       |       |       |       |       |
|------------------------------------|---------------------------|--------|-------|--------|-------|-------|-------|-------|-------|-------|-------|
| Week                               | Mouse Tumor Volume in mm3 |        |       |        |       |       |       |       | Mean  | SD    | SEM   |
|                                    | 1                         | 2      | 3     | 4      | 5     | 6     | 7     | 8     |       |       |       |
| 1                                  | 19,9                      | 42,4   | 18,6  | 6,0    | 10,2  | 48,2  | 0,0   | 31,5  | 22,1  | 17,3  | 6,1   |
| 2                                  | 117,0                     | 189,8  | 101,3 | 52,1   | 174,3 | 99,5  | 28,7  | 88,4  | 106,4 | 54,9  | 19,4  |
| 3                                  | 211,0                     | 287,1  | 190,7 | 87,9   | 231,9 | 372,0 | 44,6  | 145,5 | 196,3 | 105,5 | 37,3  |
| 4                                  | 240,9                     | 426,3  | 393,0 | 209,1  | 512,0 | 237,8 | 45,8  | 147,7 | 276,6 | 155,2 | 54,9  |
| 5                                  | 335,3                     | 567,8  | 199,6 | 274,6  | 463,1 | 394,2 | 59,5  | 156,3 | 306,3 | 167,9 | 59,4  |
| 6                                  | 418,4                     | 548,0  | 455,3 | 614,3  | 403,4 | 405,1 | 79,2  | 202,6 | 390,8 | 174,2 | 61,6  |
| 7                                  | 562,7                     | 753,0  | 583,2 | 837,6  | 570,0 | 409,6 | 123,7 | 213,6 | 506,7 | 246,5 | 87,1  |
| 8                                  | 1559,0                    | 1077,8 | 602,1 | 1064,5 | 601,5 | 534,7 | 135,9 | 224,9 | 725,1 | 478,0 | 169,0 |
